# Supplementary material
Source: Springer Nature journal article supplement (https://www.springermedizin.de/resource/supplementary/12874_2010_574_MOESM2_ESM.pdf/9432504)

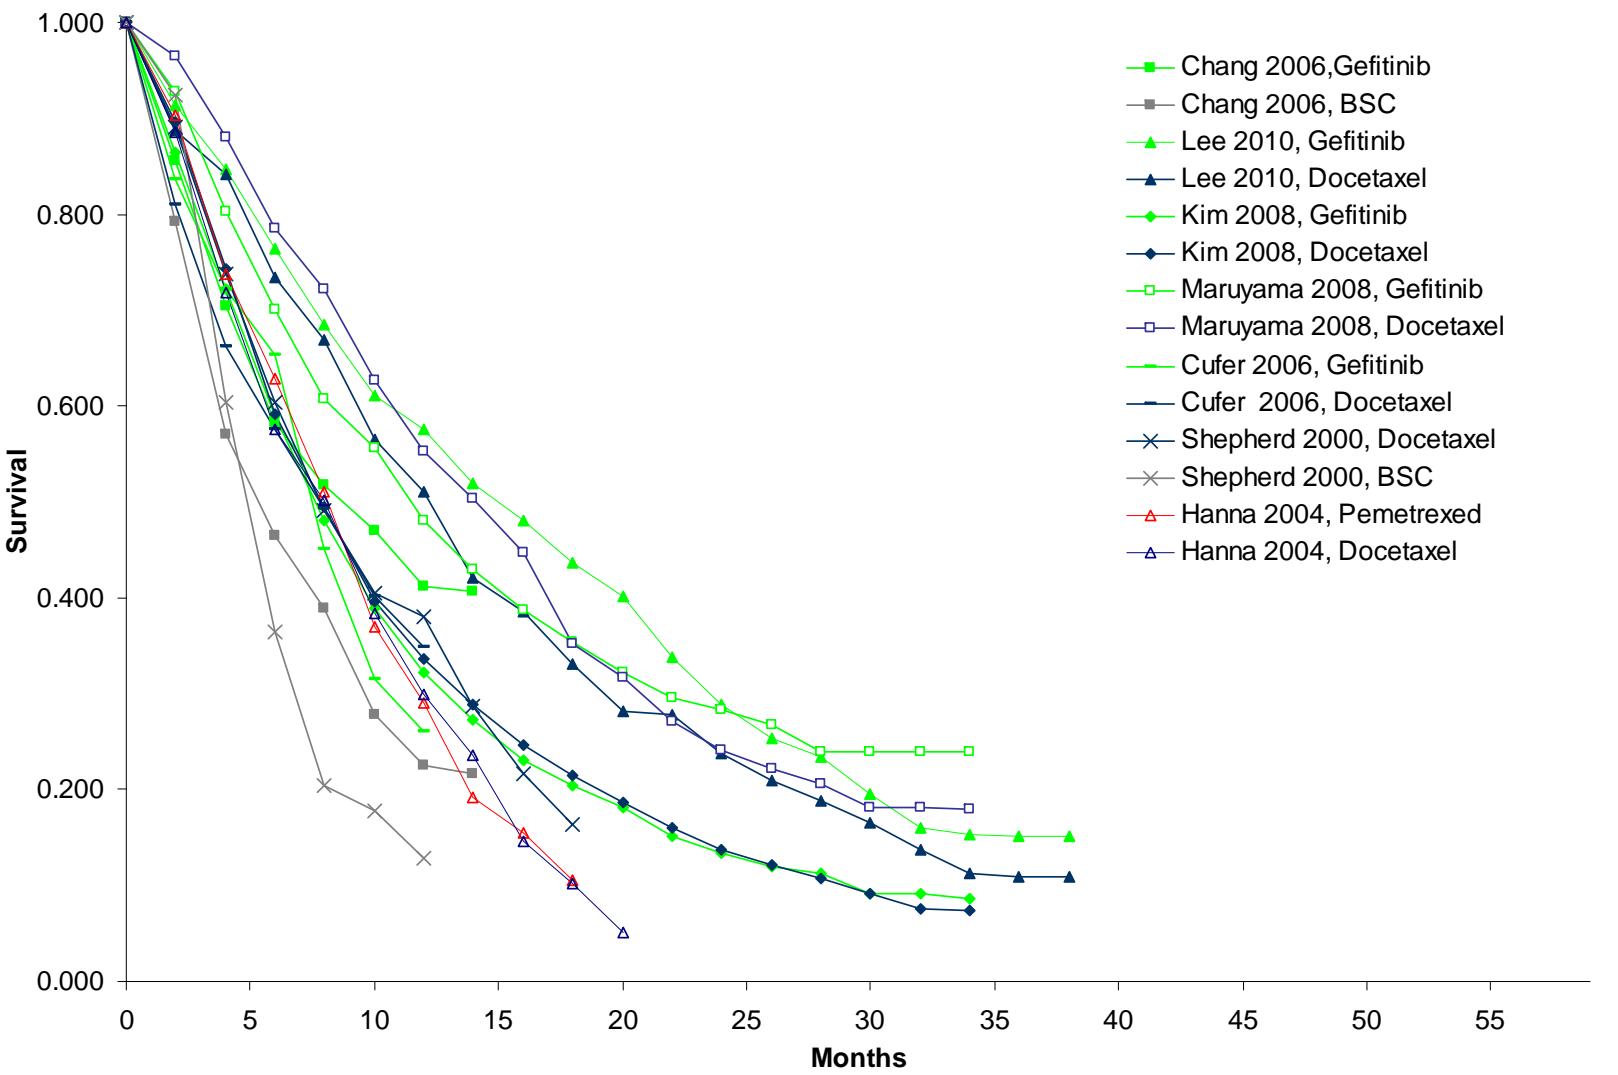

Supplement: MOESM2 [file 9432504]
